# Supplementary material
Source: PubMed Central journal article supplement (PMC6814246)
Supplement: NIHMS1055090-supplement-1.pdf [file NIHMS1055090-supplement-1.pdf]

## Supplementary Appendix

This appendix has been provided by the authors to give readers additional information about their work.

Supplement to: Panza JA, Ellis AM, Al-Khalidi HR, et al. Myocardial viability and long-term outcomes in ischemic cardiomyopathy. *N Engl J Med* 2019;381:739-48. DOI: [10.1056/NEJMoa1807365](https://doi.org/10.1056/NEJMoa1807365)

# **Myocardial Viability and Long-Term Outcomes in Ischemic Cardiomyopathy**

Julio A. Panza, MD, Alicia M. Ellis, PhD, Hussein R. Al-Khalidi, PhD, Thomas A. Holly, MD, Daniel S. Berman, MD, Jae K. Oh, MD, Gerald M. Pohost, MD, George Sopko, MD, Lukasz Chzanowski, MD, Daniel B. Mark, MD, Tomasz Kukulski, MD, Liliana E. Favalloro, MD, Gerald Maurer, MD, Pedro S. Farsky, MD, Ru-San Tan, MD, Federico M. Asch, MD, Eric J. Velazquez, MD, Jean L. Rouleau, MD, Kerry L. Lee, PhD, and Robert O. Bonow, MD

## **Supplementary Appendix**

## Table of Contents

|                                                                                                                  |    |
|------------------------------------------------------------------------------------------------------------------|----|
| <b>Figure S1.</b> Flow chart of patients included in the study .....                                             | 3  |
| <b>Figure S2.</b> All-cause and cardiovascular mortality in patients with and without viability testing .....    | 4  |
| <b>Figure S3.</b> All-cause mortality in patients with and without viable myocardium .....                       | 5  |
| <b>Figure S4.</b> Cardiovascular mortality according to viability and treatment assignment .....                 | 6  |
| <b>Figure S5.</b> All-cause mortality + CV hospitalization according to viability and treatment assignment ..... | 7  |
| <b>Figure S6.</b> Cardiovascular mortality in patients with and without LV EF improvement .....                  | 8  |
| <b>Figure S7.</b> Relation between LV EF change and viable myocardium .....                                      | 9  |
| <b>Figure S8.</b> Relation between LV EF change and baseline ESVI .....                                          | 10 |
| <b>Figure S9.</b> All-cause and cardiovascular mortality according to viability and improvement in LV EF ....    | 11 |
| <b>Table S1.</b> STICH trial inclusion and exclusion criteria .....                                              | 12 |
| <b>Table S2.</b> Baseline characteristics of patients with and without viability testing .....                   | 13 |
| <b>Table S3.</b> Baseline and 4-month functional data for subjects in the paired functional analysis .....       | 15 |

Figure S1

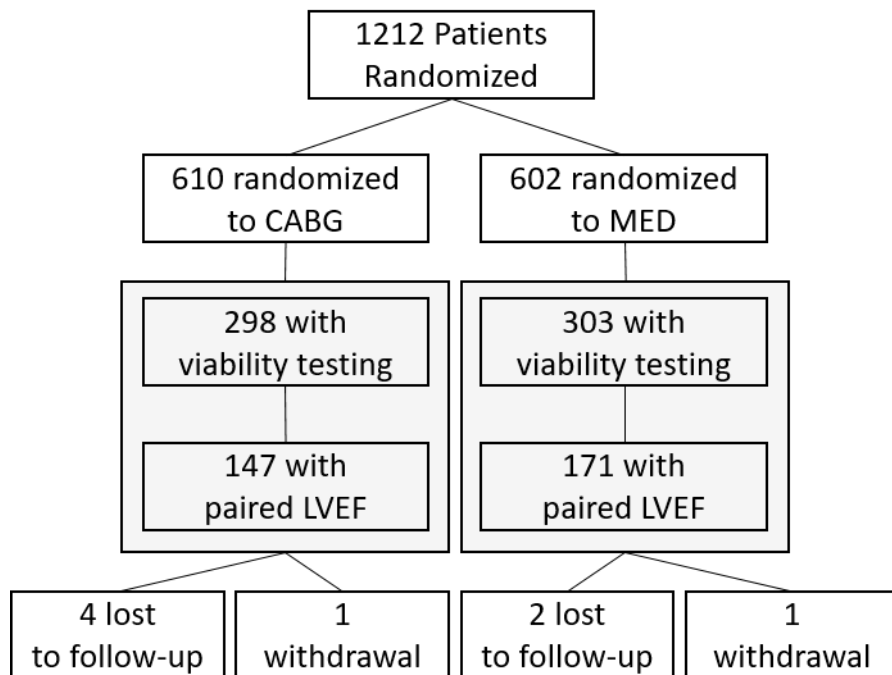

Consort diagram depicting the flow of patients included in this study.

Figure S2

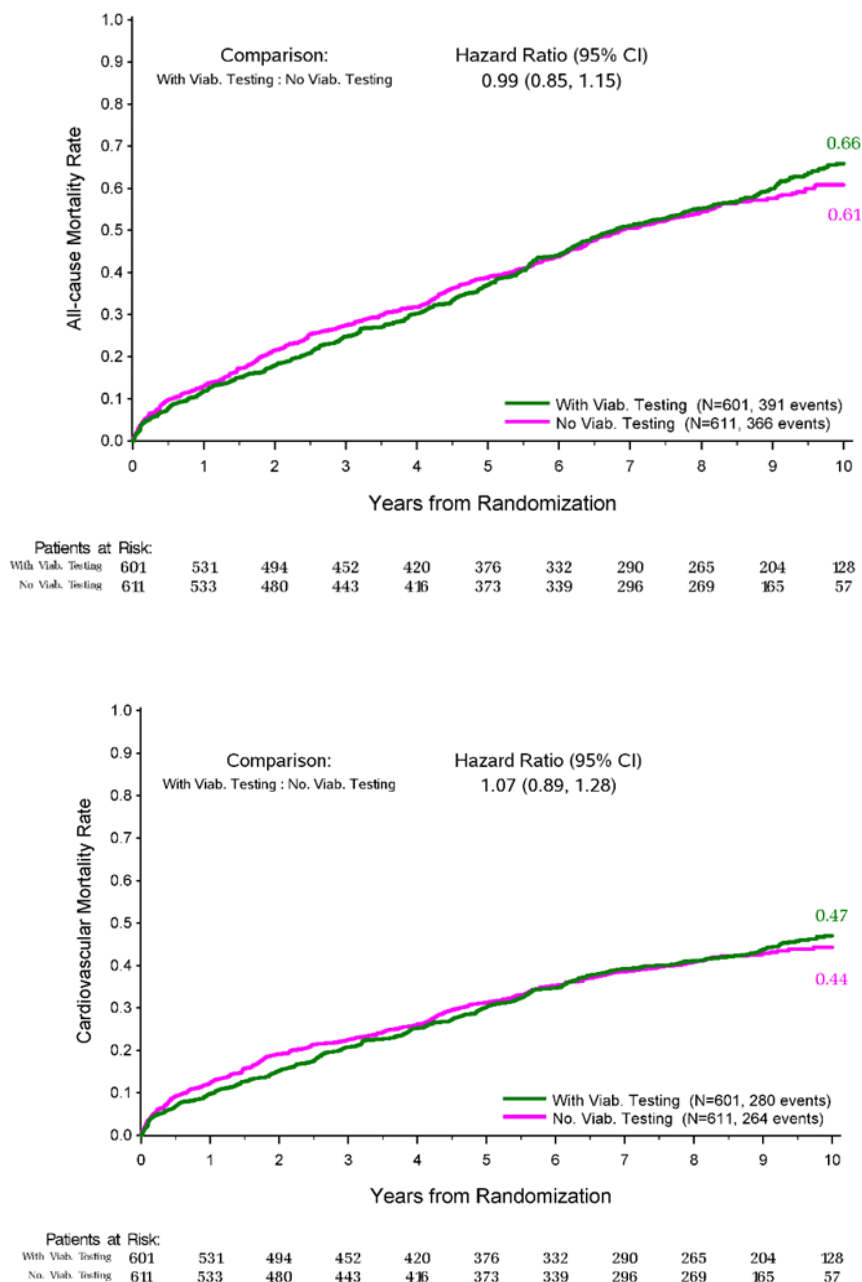

Kaplan Meier event rate curves for all-cause mortality (top panel) and cumulative incidence functions for cardiovascular mortality (bottom panel) with non-cardiovascular deaths as competing risks in patients with viability testing and without viability testing since randomization, with adjustment for baseline covariates (age, sex, race or ethnic group, New York Heart Association functional class at baseline, history of myocardial infarction, previous revascularization, baseline EF, number of diseased vessels, chronic renal insufficiency, mitral regurgitation, history of stroke, and history of atrial fibrillation).

Figure S3

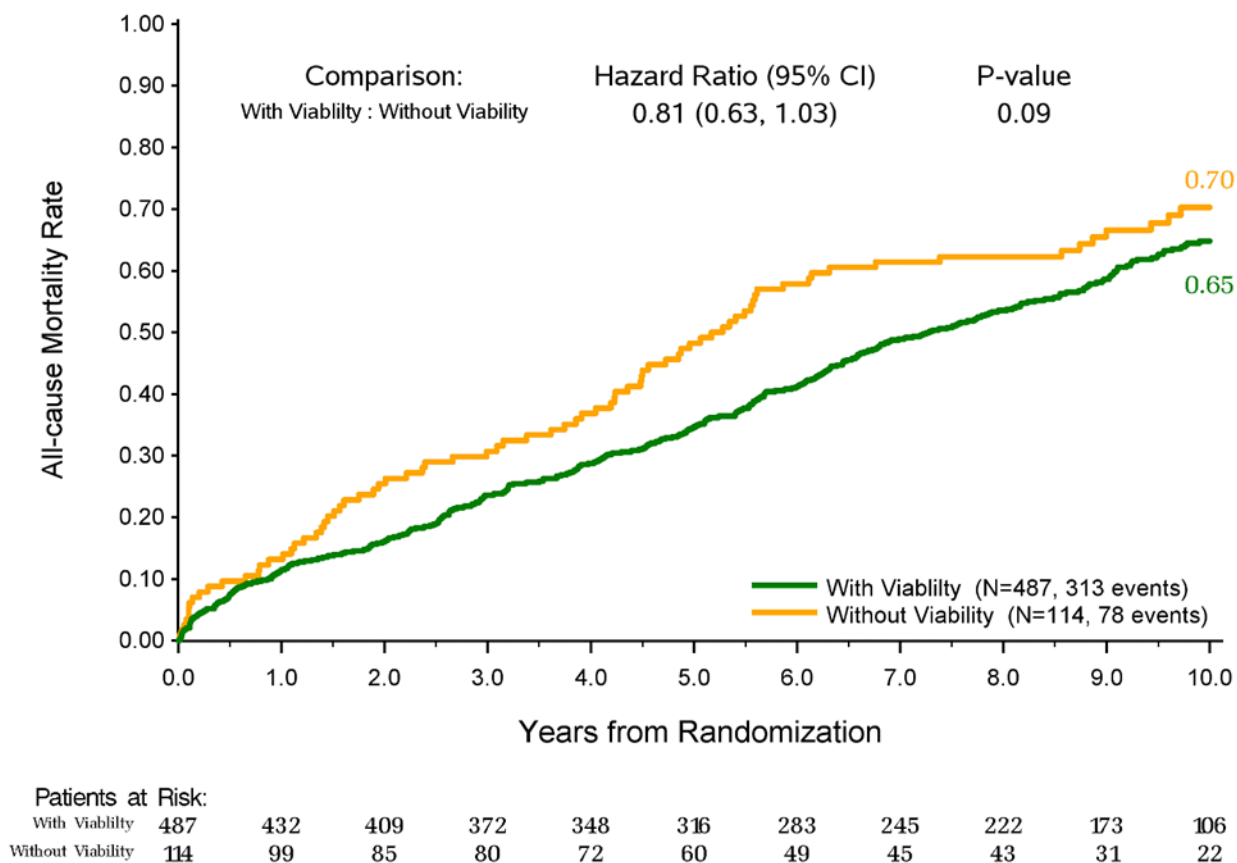

Kaplan Meier event rate curves for rates of all-cause mortality in patients with and without viable myocardium and results of Cox proportional hazards model. After adjustment for baseline covariates, the between-group difference was also not significant ( $P=0.64$ ).

Figure S4

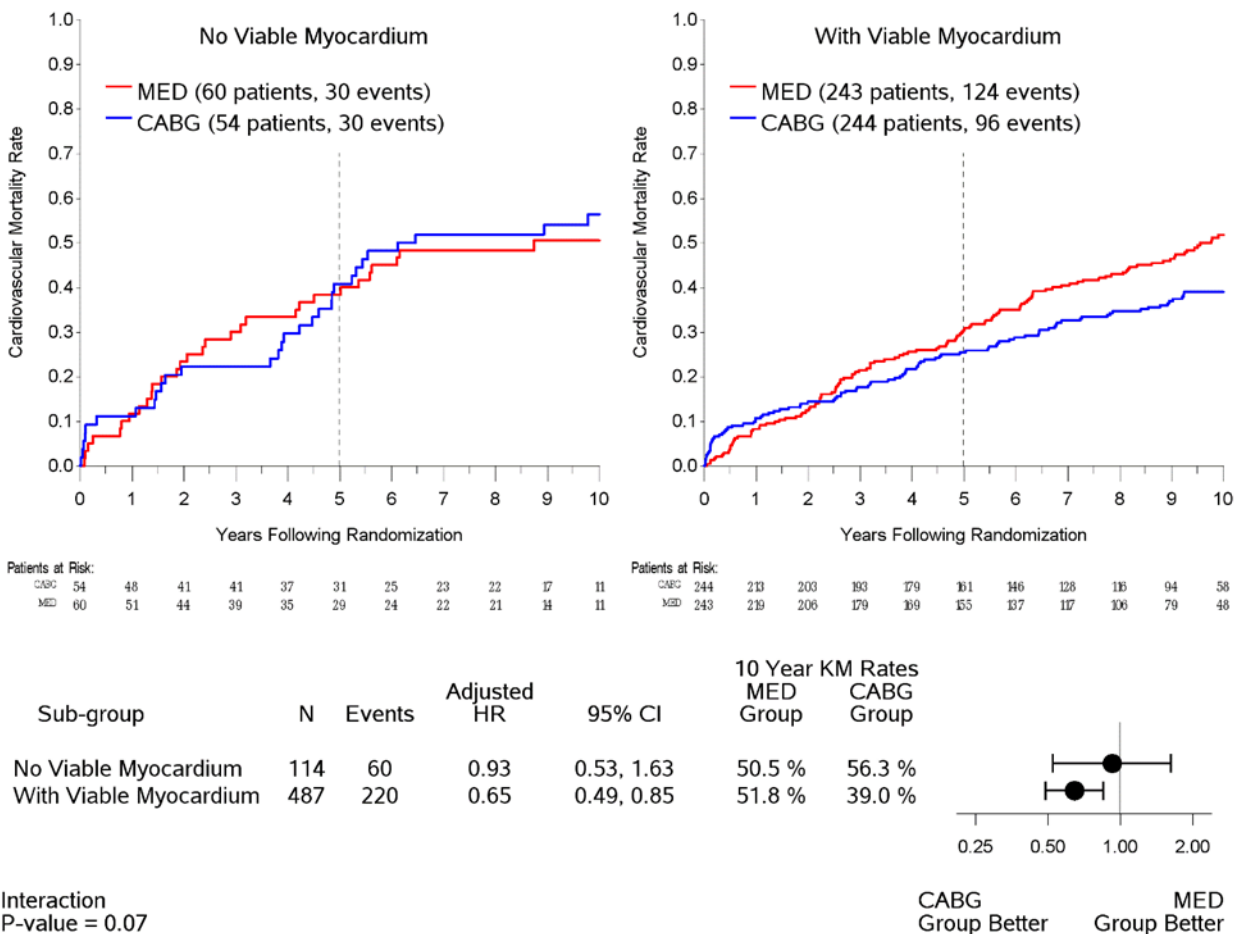

Cumulative incidence functions for rates of cardiovascular mortality with non-cardiovascular deaths as competing risks in patients without viable myocardium (left panel) and with viable myocardium (right panel) by treatment at randomization and results of cumulative incidence function for interaction between viability and treatment with adjustment for baseline covariates. The vertical dash lines indicate the 5-year follow-up time point.

Figure S5

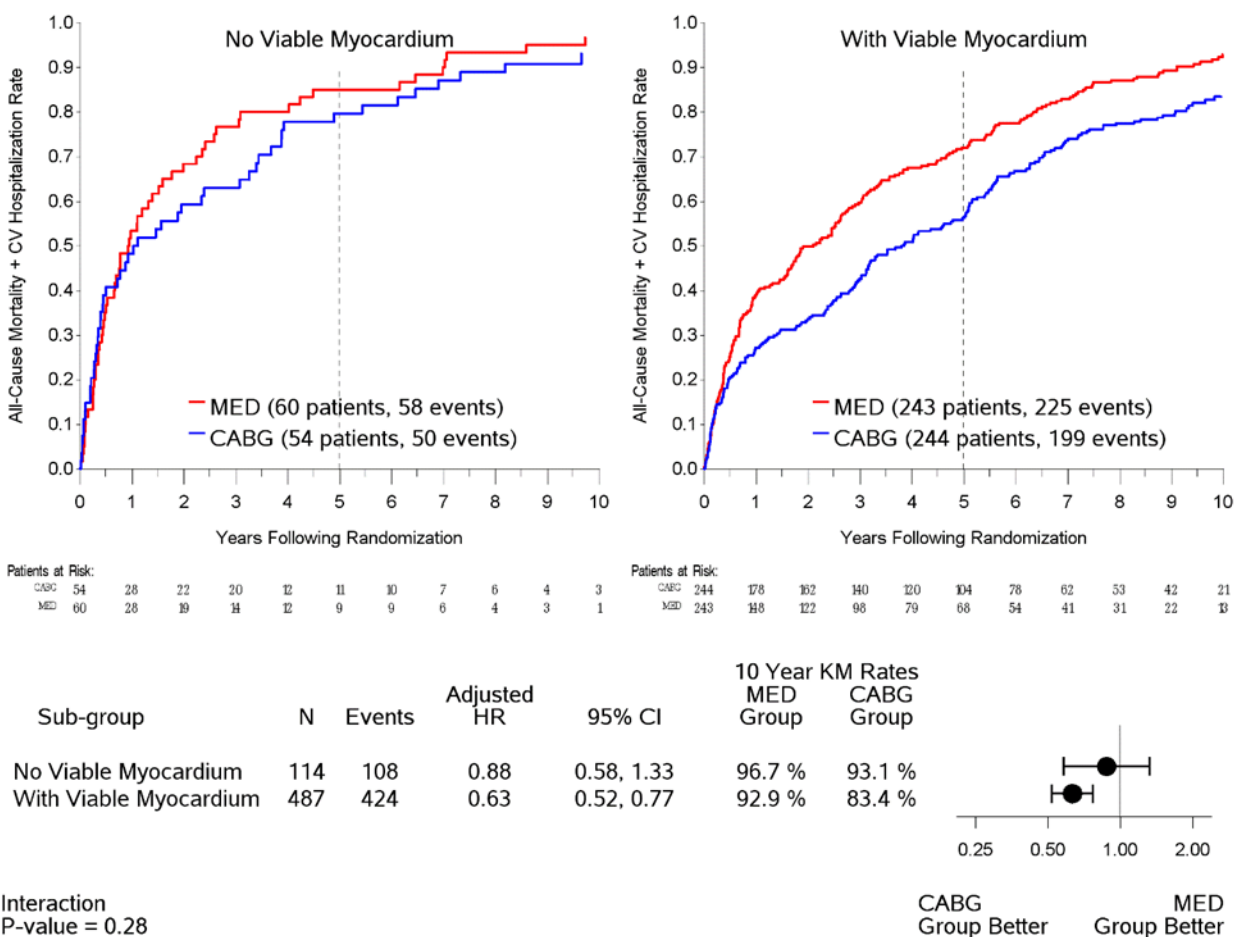

Kaplan Meier event rate curves for rates of all-cause mortality + CV hospitalization in patients without viable myocardium (left panel) and with viable myocardium (right panel) by treatment at randomization, and results of Cox proportional hazards model for interaction between viability and treatment with adjustment for baseline covariates and with imputation for missing values. The vertical dash lines indicate the 5-year follow-up time point.



Figure S6

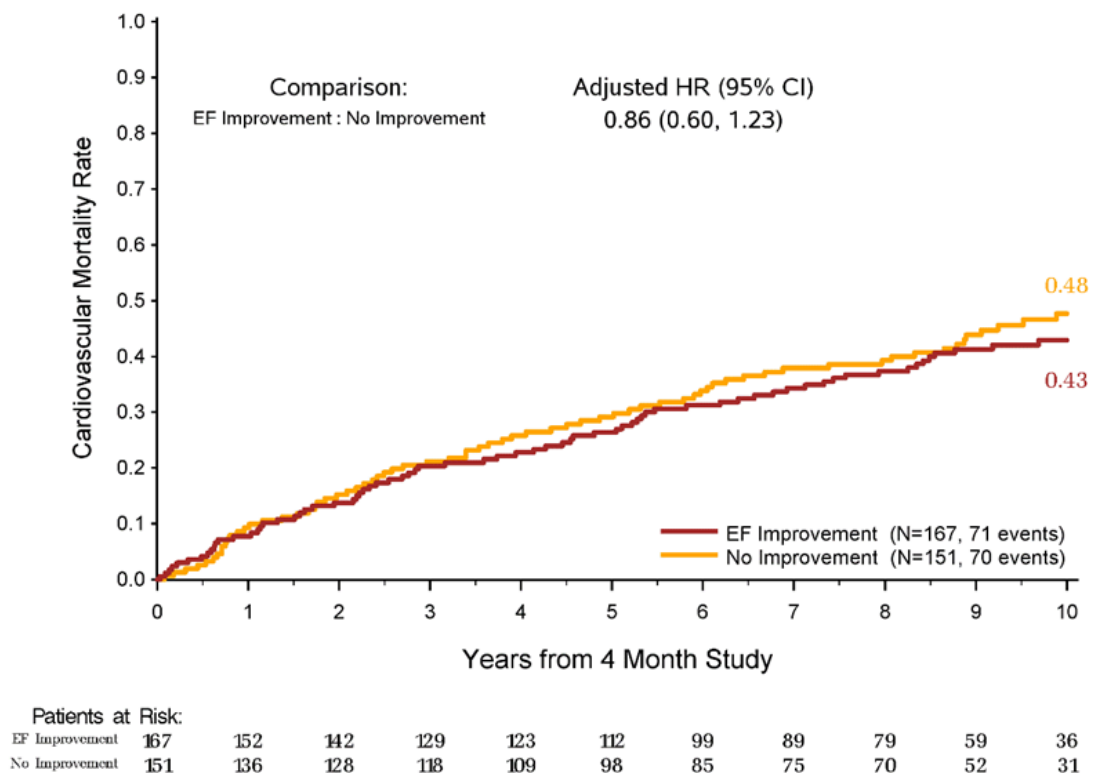

Landmark analysis for the 318 patients with viability testing and paired EF's showing cumulative incidence function for cardiovascular mortality with non-cardiovascular deaths as competing risks in patients with and without LV EF improvement and results of Cox proportional hazards models with adjustment for baseline covariates.

Figure S7

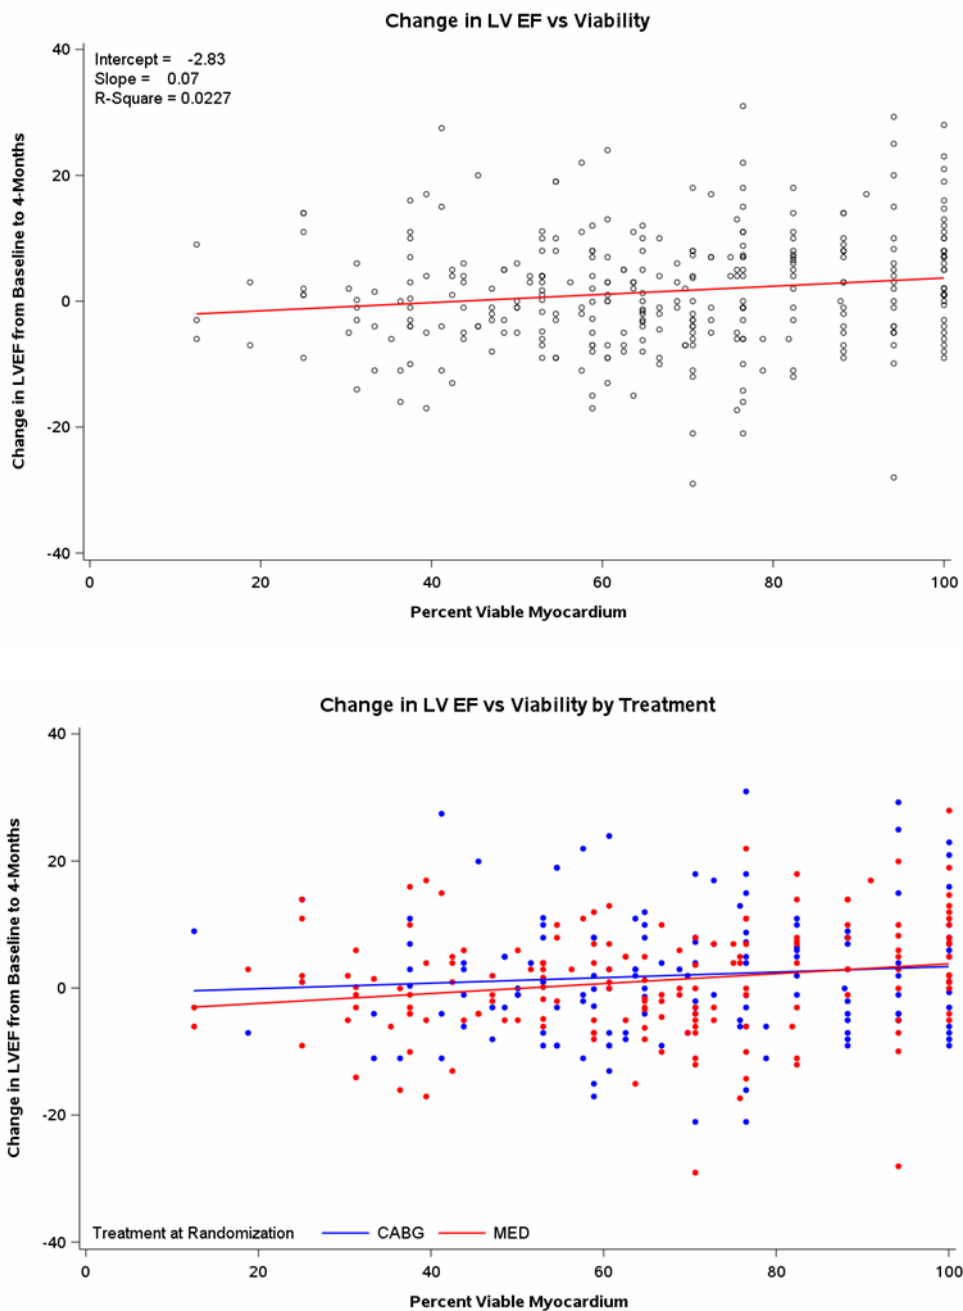

Scatter plot and regression lines for change in LV EF from baseline to 4-month study versus percent viable myocardium for all patients with a viability test (top panel) and separately dividing patients by treatment assignment (CABG or MED) (bottom panel) .

Figure S8

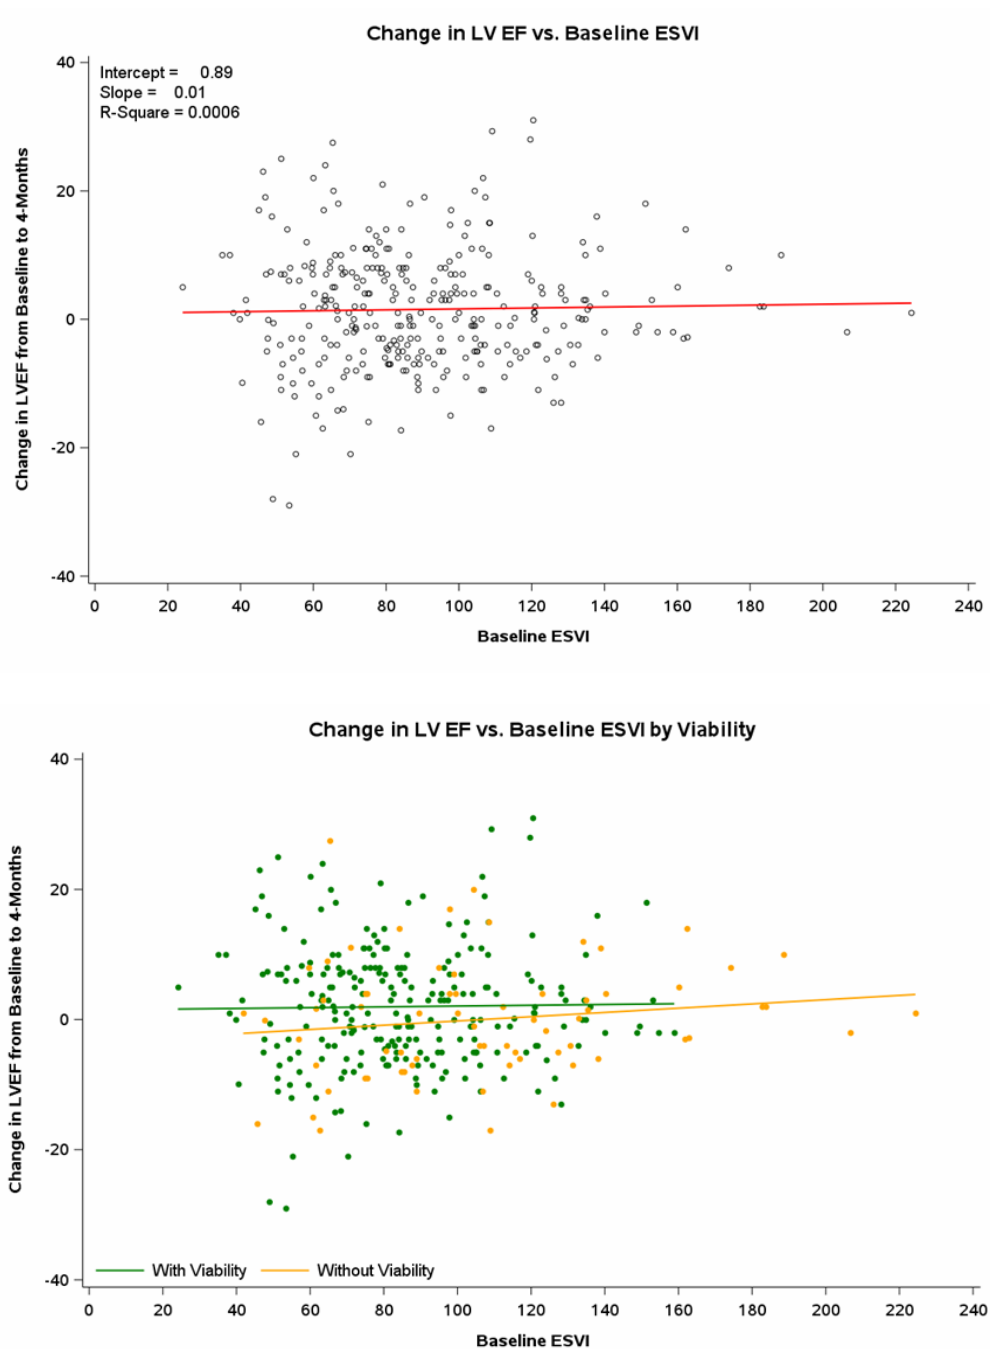

Scatter plot and regression lines for change in LV EF from baseline to 4-month study versus baseline end-systolic volume index (ESVI) for all patients with a viability test (top panel) and separately dividing patients by viability (with vs. without viable myocardium [green dots and orange dots, respectively]) (bottom panel).

Figure S9

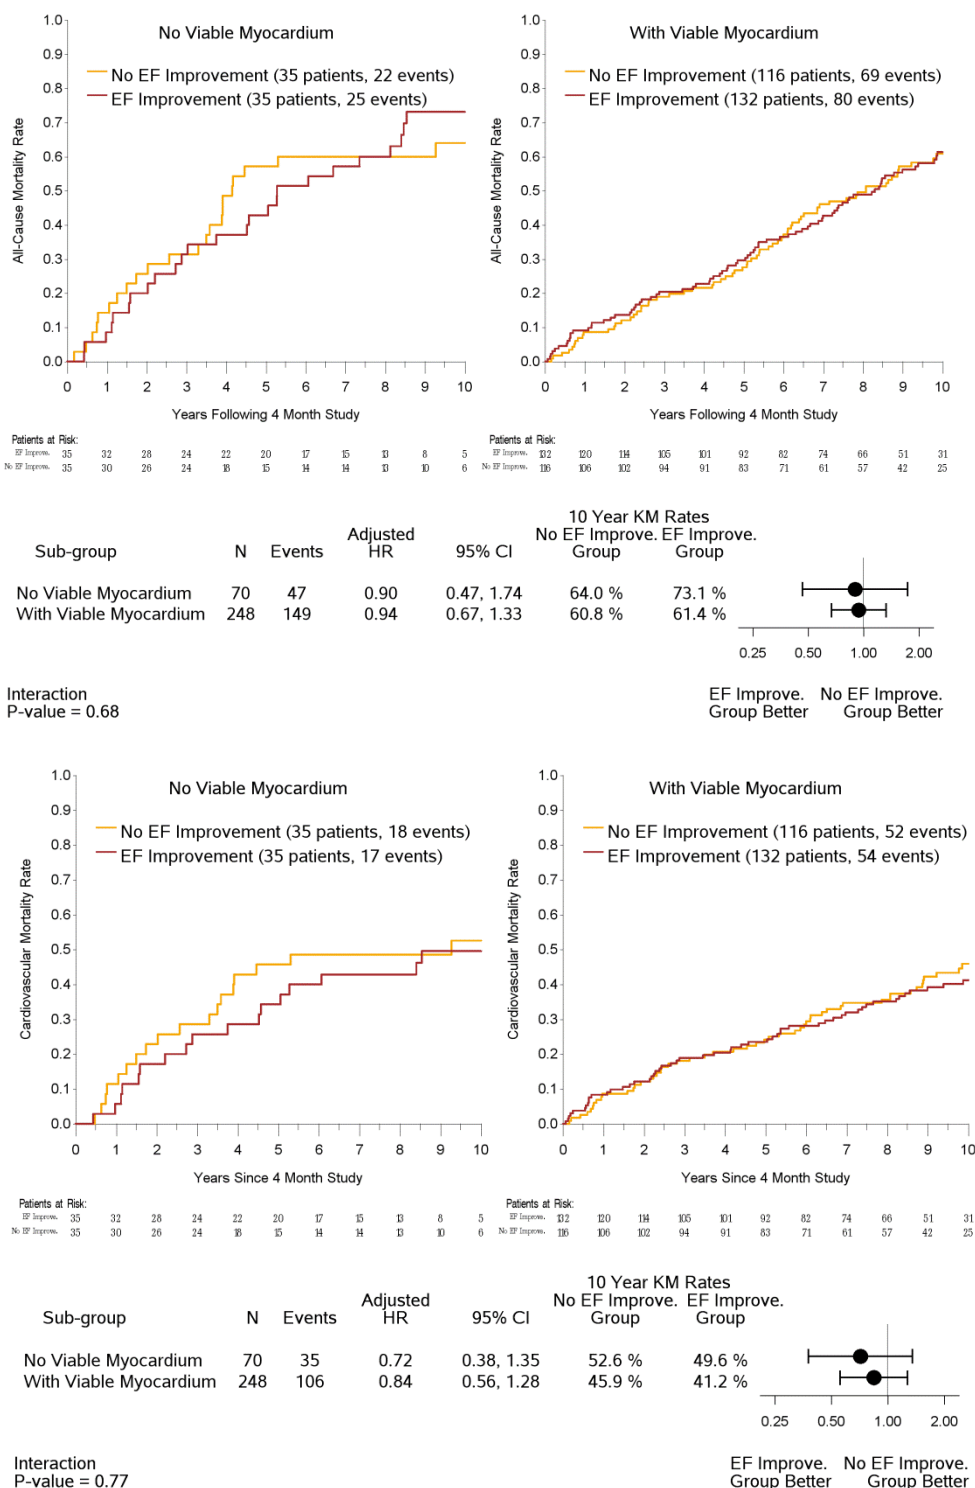

Landmark analysis for the 318 patients with viability testing and paired EF's showing Kaplan Meier event rate curves for all-cause mortality (top panels) and cumulative incidence functions for cardiovascular mortality (bottom panels) in patients without viable myocardium (left panels) and in those with viable myocardium (right panels) according to improvement or no improvement in LV EF between baseline and 4 months, and results of Cox proportional hazards models with adjustment for baseline covariates.

**Table S1.** STICH trial entry criteria

| <b>Inclusion criteria*</b>                                                                                                                                                                                                                                                                                                                                                                                                                                                                                                                                                                                                                                                                                                                                                                                                                                                                                                                                                                                                                                 |
|------------------------------------------------------------------------------------------------------------------------------------------------------------------------------------------------------------------------------------------------------------------------------------------------------------------------------------------------------------------------------------------------------------------------------------------------------------------------------------------------------------------------------------------------------------------------------------------------------------------------------------------------------------------------------------------------------------------------------------------------------------------------------------------------------------------------------------------------------------------------------------------------------------------------------------------------------------------------------------------------------------------------------------------------------------|
| <ul style="list-style-type: none"> <li>• Men</li> <li>• Women not of childbearing potential</li> <li>• Age <math>\geq 18</math> years</li> <li>• LVEF <math>\leq 0.35</math> measured by contrast magnetic resonance ventriculogram, gated SPECT ventriculogram, echo, or contrast ventriculogram within 3 months of trial entry</li> <li>• CAD suitable for revascularization</li> </ul>                                                                                                                                                                                                                                                                                                                                                                                                                                                                                                                                                                                                                                                                  |
| <b>Exclusion criteria†</b>                                                                                                                                                                                                                                                                                                                                                                                                                                                                                                                                                                                                                                                                                                                                                                                                                                                                                                                                                                                                                                 |
| <ul style="list-style-type: none"> <li>• Failure to provide informed consent</li> <li>• Aortic valvular heart disease indicating need for aortic valve repair or replacement</li> <li>• Cardiogenic shock (within 72 hrs of randomization); defined by need for IABP support or requirement of IV inotropic support</li> <li>• Plan for PCI of CAD</li> <li>• Recent acute MI judged to be an important cause of LV dysfunction</li> <li>• History of more than 1 prior CABG</li> <li>• Non-cardiac illness with a life expectancy of <math>&lt; 3</math> yrs</li> <li>• Non-cardiac illness imposing substantial operative mortality</li> <li>• Conditions/circumstances likely to lead to poor treatment adherence (e.g., history of poor compliance, alcohol or drug dependency, psychiatric illness, no fixed abode)</li> <li>• Prior heart, kidney, liver, or lung transplant</li> <li>• Current participation in another clinical trial in which patient is taking an investigational drug or receiving an investigational medical device</li> </ul> |
| <b>MED therapy eligibility criteria</b>                                                                                                                                                                                                                                                                                                                                                                                                                                                                                                                                                                                                                                                                                                                                                                                                                                                                                                                                                                                                                    |
| <ul style="list-style-type: none"> <li>• Absence of left main CAD defined by intraluminal stenosis <math>\geq 50\%</math></li> <li>• Absence of Canadian Class III angina or great (angina markedly limiting ordinary activity)</li> </ul>                                                                                                                                                                                                                                                                                                                                                                                                                                                                                                                                                                                                                                                                                                                                                                                                                 |

\*Patients may qualify for inclusion in the study. †None of these may exist at randomization. LV = left ventricular; EF = ejection fraction; SPECT = single photon emission computed tomography; CAD = coronary artery disease; IV = intravenous; IABP = intraaortic balloon pump; PCI = percutaneous coronary intervention; MI = myocardial infarction; CABG = coronary artery bypass grafting; MED = medical therapy; SVR = surgical ventricular reconstruction.

**Table S2. Baseline characteristics of patients with and without testing of myocardial viability**

| Characteristic                                         | All patients<br>(n=1212) | Patients with a<br>viability test<br>(n=601) | Patients without a<br>viability test<br>(n=611) | P value |
|--------------------------------------------------------|--------------------------|----------------------------------------------|-------------------------------------------------|---------|
| Age, mean $\pm$ SD                                     | 60.3 $\pm$ 9.3           | 60.7 $\pm$ 9.4                               | 59.9 $\pm$ 9.2                                  | 0.113   |
| Male, no. (%)                                          | 1064 (87.7)              | 521 (86.7)                                   | 543 (88.9)                                      | 0.246   |
| Race, no. (%)                                          |                          |                                              |                                                 | <0.001  |
| White                                                  | 827 (68.2)               | 496 (82.5)                                   | 331 (54.2)                                      |         |
| Black                                                  | 31 (2.6)                 | 18 (3.0)                                     | 13 (2.1)                                        |         |
| Asian                                                  | 209 (17.2)               | 29 (4.8)                                     | 180 (29.5)                                      |         |
| Other                                                  | 141 (11.6)               | 54 (9.0)                                     | 87 (14.2)                                       |         |
| Multiracial                                            | 4 (0.3)                  | 4 (0.7)                                      | 0 (0.0)                                         |         |
| Prior myocardial infarction, no. (%)                   | 934 (77.1)               | 481 (80.0)                                   | 453 (74.1)                                      | 0.015   |
| Diabetes, no. (%)                                      | 478 (39.4)               | 224 (37.3)                                   | 254 (41.6)                                      | 0.126   |
| Stroke, no. (%)                                        | 92 (7.6)                 | 53 (8.8)                                     | 39 (6.4)                                        | 0.109   |
| Hypertension, no. (%)                                  | 738 (60.1)               | 363 (60.4)                                   | 365 (59.7)                                      | 0.814   |
| Hyperlipidemia, no. (%)                                | 730 (60.3)               | 403 (67.3)                                   | 327 (53.5)                                      | <0.001  |
| Current smoker, no. (%)                                | 252 (20.8)               | 126 (21.0)                                   | 126 (20.7)                                      | 0.894   |
| Chronic renal insufficiency, no. (%)                   | 94 (7.8)                 | 43 (7.2)                                     | 51 (8.3)                                        | 0.443   |
| Atrial flutter/fibrillation, no. (%)                   | 153 (12.6)               | 90 (15.0)                                    | 63 (10.3)                                       | 0.015   |
| Peripheral vascular disease, no. (%)                   | 184 (15.2)               | 91 (15.1)                                    | 93 (15.2)                                       | 0.969   |
| RAR score, mean $\pm$ SD                               | 12.7 $\pm$ 8.8           | 12.5 $\pm$ 8.8                               | 12.9 $\pm$ 8.8                                  | 0.311   |
| Previous CABG, no. (%)                                 | 36 (3.0)                 | 16 (2.7)                                     | 20 (3.3)                                        | 0.531   |
| Bypass graft status, no. (%)                           |                          |                                              |                                                 |         |
| $\geq$ 1 stenosed or occluded                          | 35 (97.2)                | 15 (93.8)                                    | 20 (100)                                        | 0.444   |
| $\geq$ 1 occluded                                      | 29 (80.6)                | 14 (87.5)                                    | 15 (75.0)                                       | 0.426   |
| Previous PCI, no. (%)                                  | 156 (12.9)               | 104 (17.3)                                   | 52 (8.5)                                        | <0.001  |
| Previous ICD, no. (%)                                  | 29 (2.4)                 | 16 (2.7)                                     | 13 (2.1)                                        | 0.543   |
| CAD distribution, no. (%)                              |                          |                                              |                                                 |         |
| No. of diseased vessels $\geq$ 75%                     |                          |                                              |                                                 | 0.416   |
| None*                                                  | 25 (2.1)                 | 12 (2.0)                                     | 13 (2.1)                                        |         |
| One-vessel                                             | 282 (23.2)               | 152 (25.3)                                   | 130 (21.3)                                      |         |
| Two-vessel                                             | 462 (38.2)               | 221 (36.8)                                   | 241 (39.4)                                      |         |
| Three-vessel                                           | 442 (36.5)               | 215 (35.8)                                   | 227 (37.2)                                      |         |
| Proximal LAD stenosis $\geq$ 75%                       | 826 (68.2)               | 389 (64.8)                                   | 437 (71.5)                                      | 0.012   |
| Left main stenosis ( $\geq$ 50%)                       | 32 (2.6)                 | 14 (2.3)                                     | 18 (2.9)                                        | 0.506   |
| Current CCS angina class, no. (%)                      |                          |                                              |                                                 | 0.023   |
| No angina                                              | 442 (36.5)               | 236 (39.3)                                   | 206 (33.7)                                      |         |
| I                                                      | 187 (15.4)               | 94 (15.6)                                    | 93 (15.2)                                       |         |
| II                                                     | 525 (43.3)               | 253 (42.1)                                   | 272 (44.5)                                      |         |
| III                                                    | 48 (4.0)                 | 14 (2.3)                                     | 34 (5.6)                                        |         |
| IV                                                     | 10 (0.8)                 | 4 (0.7)                                      | 6 (1.0)                                         |         |
| Highest NYHA functional class within 3 months, no. (%) |                          |                                              |                                                 | 0.231   |
| I                                                      | 69 (5.7)                 | 27 (4.5)                                     | 42 (6.9)                                        |         |
| II                                                     | 438 (36.1)               | 212 (35.3)                                   | 226 (37.0)                                      |         |
| III                                                    | 540 (44.6)               | 275 (45.8)                                   | 265 (43.4)                                      |         |
| IV                                                     | 165 (13.6)               | 87 (14.5)                                    | 78 (12.8)                                       |         |
| Medications at baseline, no. (%)                       |                          |                                              |                                                 |         |
| Beta blocker                                           | 1036 (85.5)              | 534 (88.9)                                   | 502 (82.2)                                      | <0.001  |
| ACE inhibitor                                          | 996 (82.2)               | 514 (85.5)                                   | 482 (78.9)                                      | 0.002   |
| Angiotensin receptor blocker                           | 115 (9.5)                | 46 (7.7)                                     | 69 (11.3)                                       | 0.031   |
| ACE inhibitor or ARB                                   | 1085 (89.5)              | 554 (92.2)                                   | 531 (86.9)                                      | 0.003   |

|                                            |                   |                   |                   |        |
|--------------------------------------------|-------------------|-------------------|-------------------|--------|
| Statin                                     | 983 (81.1)        | 508 (84.5)        | 475 (77.7)        | 0.003  |
| Aspirin                                    | 1002 (82.7)       | 513 (85.4)        | 487 (80.0)        | 0.014  |
| Digoxin                                    | 245 (20.2)        | 109 (18.1)        | 136 (22.3)        | 0.074  |
| Blood pressure, mean $\pm$ SD              |                   |                   |                   |        |
| Systolic (mmHg)                            | 121.2 $\pm$ 17.5  | 119.8 $\pm$ 17.3  | 122.5 $\pm$ 17.7  | 0.003  |
| Diastolic (mmHg)                           | 75.5 $\pm$ 11.0   | 74.7 $\pm$ 10.7   | 76.3 $\pm$ 11.3   | 0.022  |
| Heart rate, mean $\pm$ SD                  | 74.9 $\pm$ 14.7   | 73.3 $\pm$ 12.9   | 76.4 $\pm$ 16.1   | <0.001 |
| LV ejection fraction, mean $\pm$ SD        | 0.282 $\pm$ 0.086 | 0.273 $\pm$ 0.086 | 0.292 $\pm$ 0.086 | <0.001 |
| LVEDVI (ml/m <sup>2</sup> ), mean $\pm$ SD | 117.6 $\pm$ 39.2  | 122.8 $\pm$ 41.9  | 110.4 $\pm$ 33.9  | <0.001 |
| LVESVI (ml/m <sup>2</sup> ), mean $\pm$ SD | 85.5 $\pm$ 36.2   | 91.7 $\pm$ 38.9   | 78.6 $\pm$ 31.6   | <0.001 |
| Hemoglobin (g/dL), mean $\pm$ SD           | 13.8 $\pm$ 1.7    | 13.9 $\pm$ 1.7    | 13.6 $\pm$ 1.8    | 0.005  |
| Creatinine (mg/dL), mean $\pm$ SD          | 1.2 $\pm$ 0.6     | 1.2 $\pm$ 0.7     | 1.2 $\pm$ 0.5     | 0.004  |
| BUN (mg/dL), mean $\pm$ SD                 | 29.3 $\pm$ 21.2   | 29.2 $\pm$ 19.7   | 29.5 $\pm$ 22.3   | 0.980  |

\*Although some patients had no coronary artery stenosis  $\geq$ 75%, all patients had a coronary artery with stenosis  $\geq$ 50%.

ACE = angiotensin converting enzyme; ARB = angiotensin receptor blocker; BUN = blood urea nitrogen; CABG = coronary artery bypass graft surgery; CAD = coronary artery disease; EDVI = end-diastolic volume index; ESVI = end-systolic volume index; ICD = implantable cardioverter defibrillator; LV= left ventricular; NYHA = New York Heart Association; RAR = risk at randomization

**Table S3. Summary of baseline and 4-month functional data for subjects in the paired functional analysis presented as mean ± standard deviation.**

| Characteristic                                                                       | Patients with Myocardial Viability and Paired Data (N=248) |            |              |            | Patients without Myocardial Viability and with Paired Data (N=70) |            |             |            |
|--------------------------------------------------------------------------------------|------------------------------------------------------------|------------|--------------|------------|-------------------------------------------------------------------|------------|-------------|------------|
|                                                                                      | Medical Therapy (N=127)                                    |            | CABG (N=121) |            | Medical Therapy (N=44)                                            |            | CABG (N=26) |            |
|                                                                                      | Baseline                                                   | 4 Months   | Baseline     | 4 Months   | Baseline                                                          | 4 Months   | Baseline    | 4 Months   |
| Left ventricular ejection fraction — %                                               | 28.6±8.3                                                   | 30.5±9.5   | 27.8±7.5     | 30.3±10.8  | 24.1±8.8                                                          | 24.5±8.8   | 24.8±8.5    | 25.1±11.2  |
| Left ventricular end-diastolic volume index — ml/m <sup>2</sup> of body-surface area | 115.5±30.3                                                 | 114.1±32.9 | 118.6±27.1   | 114.6±30.8 | 142.4±36.8                                                        | 146.8±41.7 | 134.3±48.3  | 127.0±53.7 |
| Left ventricular end-systolic volume index — ml/m <sup>2</sup> of body-surface area  | 83.6±27.6                                                  | 80.9±30.4  | 86.3±24.3    | 81.7±29.3  | 110.3±36.6                                                        | 112.7±39.8 | 102.9±45.5  | 97.3±50.0  |
